# Supplementary material for: Indium selenide monolayer: a two-dimensional material with strong second harmonic generation
Source: Royal Society of Chemistry journal article supplement (doi:10.1039/c8ce00154e), 2018-01-01
Supplement: c8ce00154e1.pdf [file c8ce00154e1.pdf]

**Electronic Supplementary Information for the paper:**  
**“Indium Selenide Monolayer: A Two-Dimensional Material**  
**with Strong Second Harmonic Generation”**

Jing Lin <sup>a</sup>, Zhenxing Fang <sup>b</sup>, Huilin Tao <sup>a</sup>, Yi Li <sup>a,c</sup>, Xin Huang <sup>a,c</sup>, Kaining Ding <sup>a</sup>, Shuping Huang <sup>a</sup>,  
and Yongfan Zhang <sup>a,c,\*</sup>

<sup>a</sup> *State Key Laboratory of Photocatalysis on Energy and Environment, College of Chemistry, Fuzhou University, Fuzhou, Fujian, 350116, China*

<sup>b</sup> *Department of Physics, Zunyi Normal University, Zunyi, Guizhou, 563006, China*

<sup>c</sup> *Fujian Provincial Key Laboratory of Theoretical and Computational Chemistry, Xiamen, Fujian, 361005, China*

\* E-mail: zhangyf@fzu.edu.cn

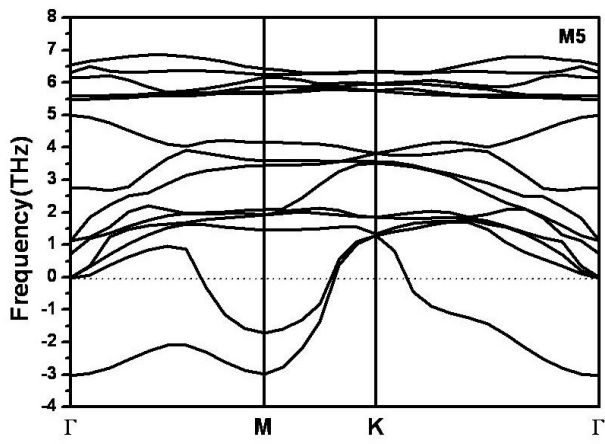

(a) M5 model

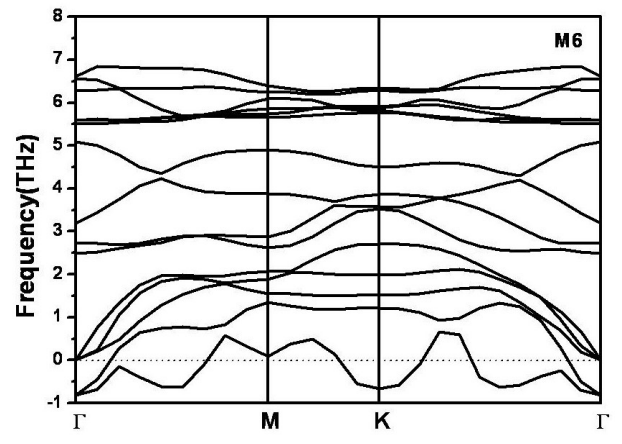

(b) M6 model

Figure S1 The calculated phonon spectra of (a) M5 model and (b) M6 model

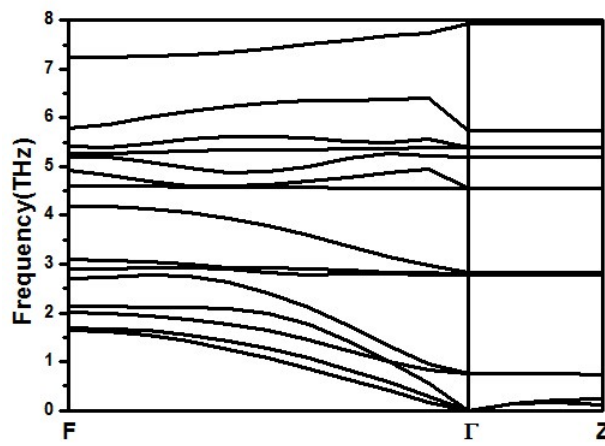

(a) In<sub>2</sub>Se<sub>3</sub>-R3m

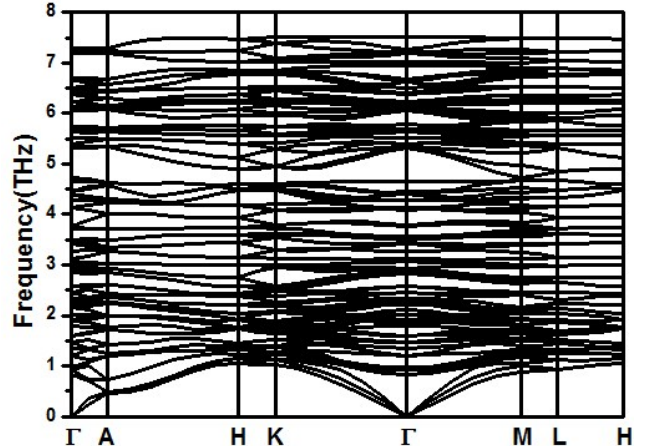

(b) In<sub>2</sub>Se<sub>3</sub>-P6<sub>1</sub>

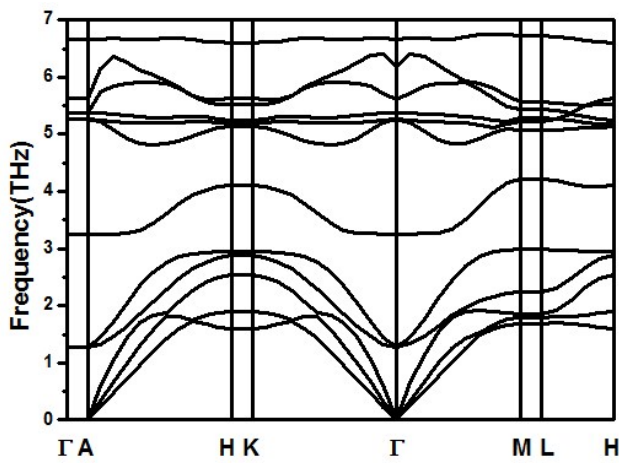

(c) InSe ML

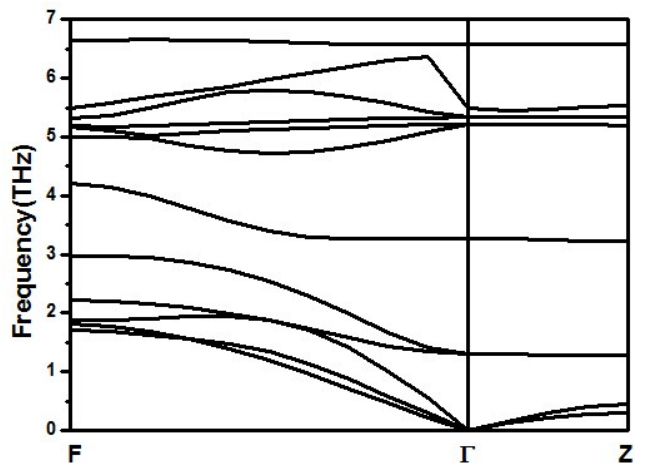

(d) InSe-R3m

Figure S2 The calculated phonon spectra of different In-Se compounds including (a) In<sub>2</sub>Se<sub>3</sub>-R3m, (b) In<sub>2</sub>Se<sub>3</sub>-P6<sub>1</sub>, (c) InSe ML, (d) InSe-R3m.

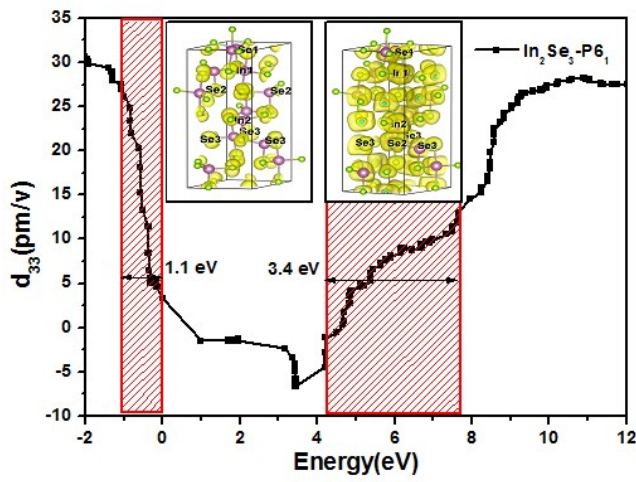

(a)  $\text{In}_2\text{Se}_3\text{-P6}_1$

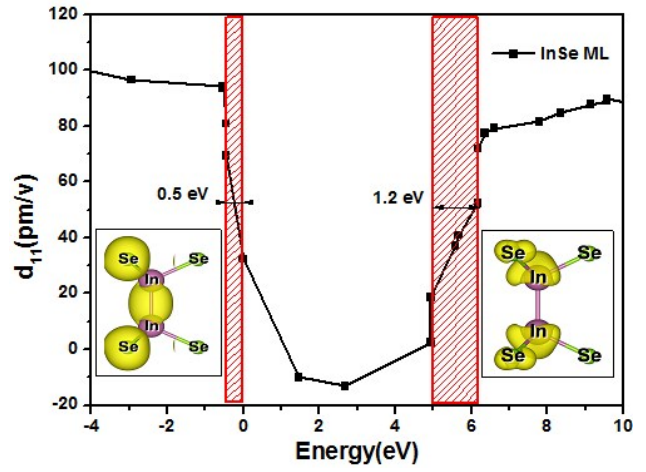

(b) InSe ML

Figure S3 Variation of static SHG coefficient as a function of the cutoff energy of (a)  $\text{In}_2\text{Se}_3\text{-P6}_1$ , and (b) InSe-ML. The partial charge density maps shown in the insets of (a) are drawn by considering bands in the energy regions from -1.1 eV to VBM and from 4.2 to 7.7 eV, respectively, while in (b) the corresponding energy regions are from -0.5 eV to VBM and from 5.0 to 6.2 eV, respectively.
